# Supplementary material
Source: PubMed Central journal article supplement (PMC6440215)
Supplement: NIHMS1523591-supplement-1.pdf [file NIHMS1523591-supplement-1.pdf]

# Supplementary Figure 1

*NF1*

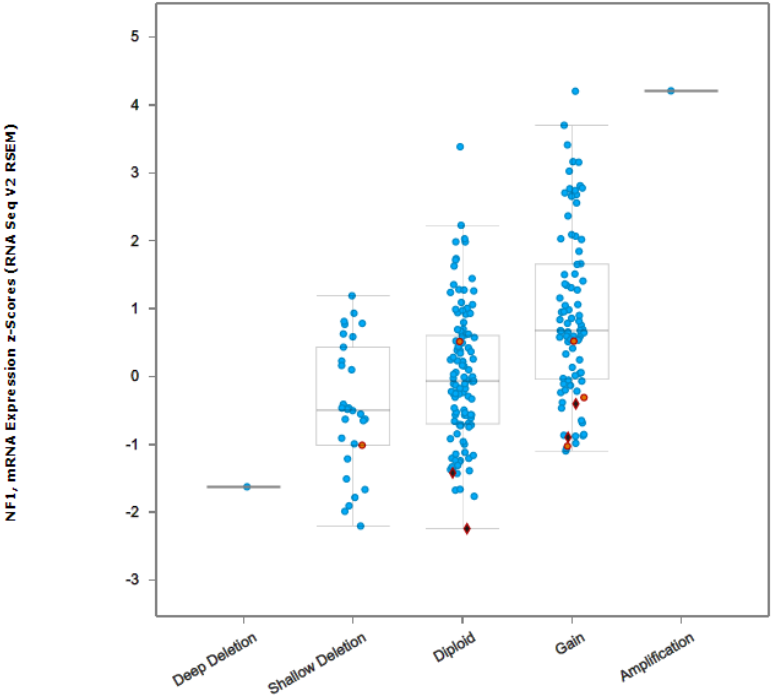

NF1, Putative copy-number alterations from GISTIC

*RASA1*

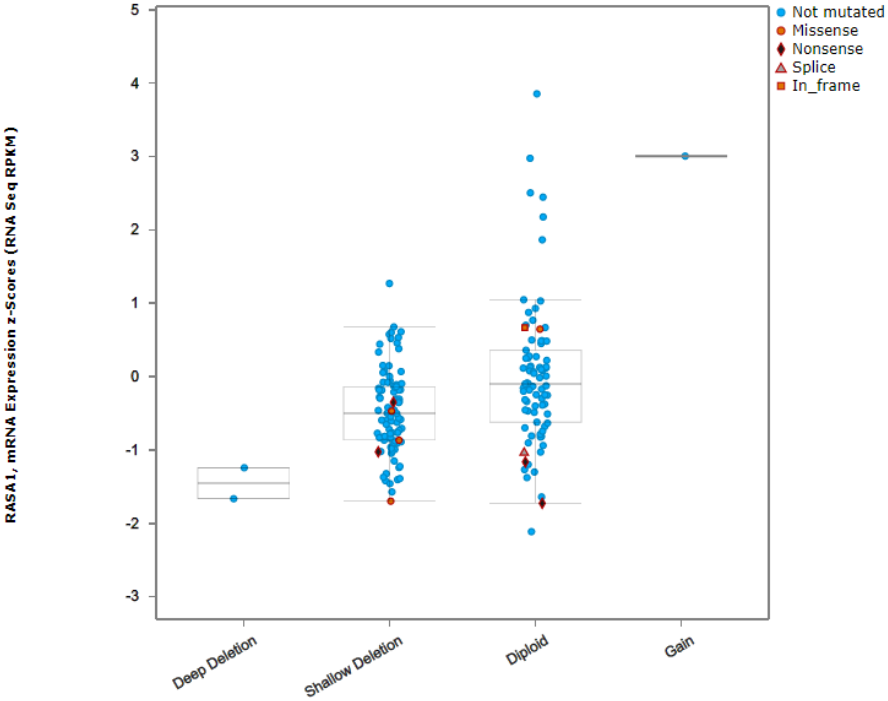

RASA1, Putative copy-number alterations from GISTIC
