# Supplementary material
Source: PubMed Central journal article supplement (PMC6440215)
Supplement: NIHMS1523591-supplement-5.pdf [file NIHMS1523591-supplement-5.pdf]

**Table S3. Clinicopathological Features of Patients with RASA1 and NF1 Mutated Lung Cancer in MSKCC cohort.**

|                                     | <b>All</b> | <b>RASA1 + NF1</b> | <b>RASA1 only</b> | <b>NF1 only</b> |
|-------------------------------------|------------|--------------------|-------------------|-----------------|
| <b>Median age, y (range)</b>        | 68 (42-90) | 69 (46-81)         | 71 (48-82)        | 68 (42-90)      |
| <b>Age, n (%)</b>                   |            |                    |                   |                 |
| < 65 y                              | 43 (37)    | 3 (19)             | 7 (37)            | 33 (41)         |
| ≥ 65 y                              | 72 (63)    | 13 (81)            | 12 (63)           | 47 (59)         |
| <b>Sex, n (%)</b>                   |            |                    |                   |                 |
| Male                                | 50 (43)    | 8 (50)             | 11 (58)           | 31 (39)         |
| Female                              | 65 (57)    | 8 (50)             | 8 (42)            | 49 (61)         |
| <b>Ethnicity, n (%)</b>             |            |                    |                   |                 |
| Caucasian                           | 97 (84)    | 13 (81)            | 18 (95)           | 66 (83)         |
| Black                               | 6 (5)      | 2 (13)             | 1 (5)             | 3 (4)           |
| Asian                               | 4 (3)      | 0 (0)              | 0 (0)             | 4 (5)           |
| Other / NA                          | 8 (7)      | 1 (6)              | 0 (0)             | 7 (9)           |
| <b>Smoking History, n (%)</b>       |            |                    |                   |                 |
| Total, smokers                      | 106 (92)   | 10 (100)           | 17 (89)           | 73 (91)         |
| Former smoker                       | 81 (76)    | 8 (80)             | 14 (82)           | 56 (77)         |
| Current smoker                      | 25 (24)    | 2 (20)             | 3 (18)            | 17 (23)         |
| Never smoker                        | 9 (8)      | 0 (0)              | 2 (11)            | 7 (9)           |
| <b>Pack Years, median (range)</b>   | 40 (1-163) | 48 (21-100)        | 50 (4-75)         | 31 (1-163)      |
| <b>Histologic Subtype, n (%)</b>    |            |                    |                   |                 |
| Adenocarcinoma                      | 73 (67)    | 5 (50)             | 3 (16)            | 65 (81)         |
| Squamous cell carcinoma             | 22 (20)    | 4 (40)             | 12 (63)           | 6 (8)           |
| Adenosquamous carcinoma             | 3 (3)      | 1 (10)             | 1 (5)             | 1 (1)           |
| Sarcomatoid carcinoma               | 3 (3)      | 0 (0)              | 1 (5)             | 2 (3)           |
| Large cell neuroendocrine carcinoma | 2 (2)      | 0 (0)              | 1 (5)             | 1 (1)           |
| NSLC, NOS                           | 6 (6)      | 0 (0)              | 1 (5)             | 5 (6)           |
| <b>Site Tested, n (%)</b>           |            |                    |                   |                 |
| Primary                             | 66 (57)    | 11 (69)            | 16 (84)           | 39 (49)         |
| Metastatic                          | 49 (43)    | 5 (31)             | 3 (16)            | 41 (51)         |
| <b>Stage, n (%)</b>                 |            |                    |                   |                 |
| I                                   | 20 (17)    | 3 (19)             | 4 (21)            | 14 (18)         |
| II                                  | 13 (11)    | 1 (6)              | 4 (21)            | 8 (10)          |
| III                                 | 18 (16)    | 3 (19)             | 3 (16)            | 11 (14)         |
| IV                                  | 64 (56)    | 9 (56)             | 8 (42)            | 47 (59)         |
