# Supplementary material
Source: PubMed Central journal article supplement (PMC6440215)
Supplement: NIHMS1523591-supplement-6.pdf [file NIHMS1523591-supplement-6.pdf]

**Table S1. Antibodies for western blot analysis.**

| Antibody                       | Company                      | Catalog number |
|--------------------------------|------------------------------|----------------|
| phospho-EGF Receptor (Tyr1068) | Cell Signaling Technology    | #3777          |
| EGF Receptor                   | BD Transduction Laboratories | #610016        |
| SOS1                           | Cell Signaling Technology    | #5890          |
| RASGRP1                        | Abcam                        | #ab37927       |
| RASGRP3                        | Cell Signaling Technology    | #3334          |
| phospho-AKT (Ser473)           | Cell Signaling Technology    | #4060          |
| AKT                            | Cell Signaling Technology    | #9272          |
| phospho-MEK1/2 (Ser217/221)    | Cell Signaling Technology    | # 9154         |
| MEK1                           | Cell Signaling Technology    | #2352          |
| phospho-ERK (Thr202/Thr204)    | Cell Signaling Technology    | #4370          |
| ERK1/2                         | Cell Signaling Technology    | #9102          |
| RASA1                          | Abcam                        | #ab40677       |
| Neurofibromin                  | Abcam                        | #ab17963       |
| CDK2                           | Cell Signaling Technology    | #2546          |
| CDK4                           | Cell Signaling Technology    | #12790         |
| p27 <sup>Kip1</sup>            | Cell Signaling Technology    | #3686          |
| phospho-Rb (Ser780)            | Cell Signaling Technology    | #8180          |
| phospho-Rb (Ser807/811)        | Cell Signaling Technology    | #8516          |
| cleaved PARP                   | Cell Signaling Technology    | #5625          |
| GAPDH                          | Cell Signaling Technology    | #3683          |
| Actin                          | Cell Signaling Technology    | #4986          |
