# Supplementary material
Source: PubMed Central journal article supplement (PMC6440215)

Figure S2

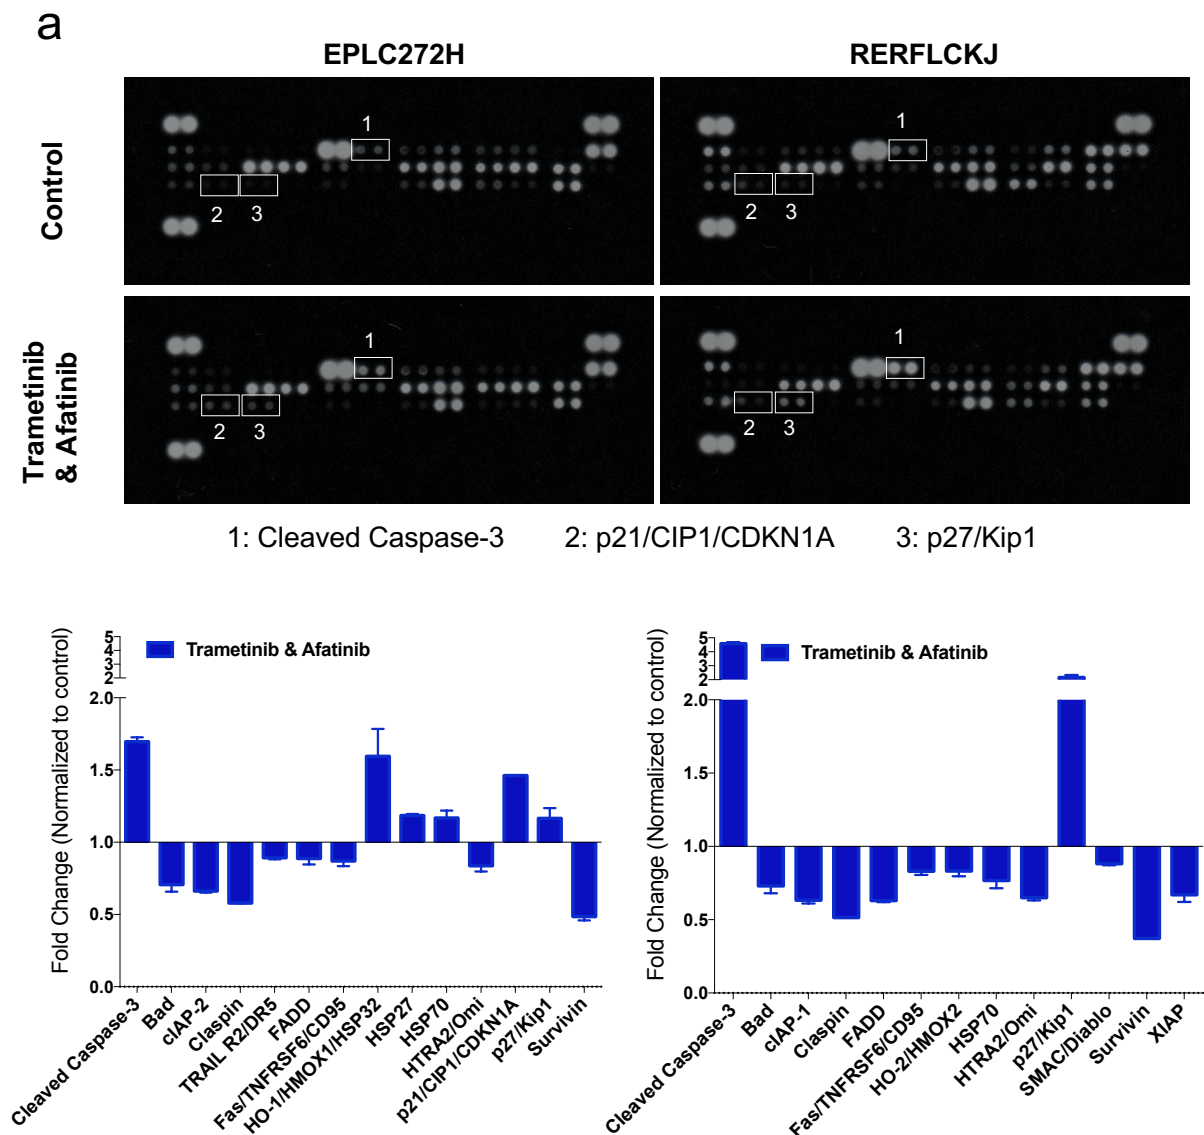

**b**

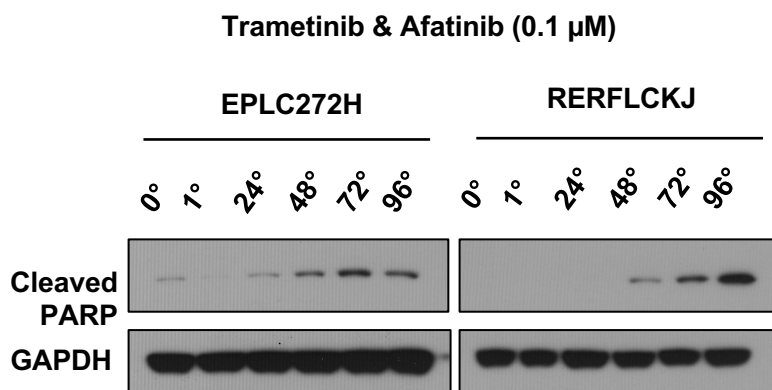

Supplement: NIHMS1523591-supplement-2.pdf [file NIHMS1523591-supplement-2.pdf]

Figure S3

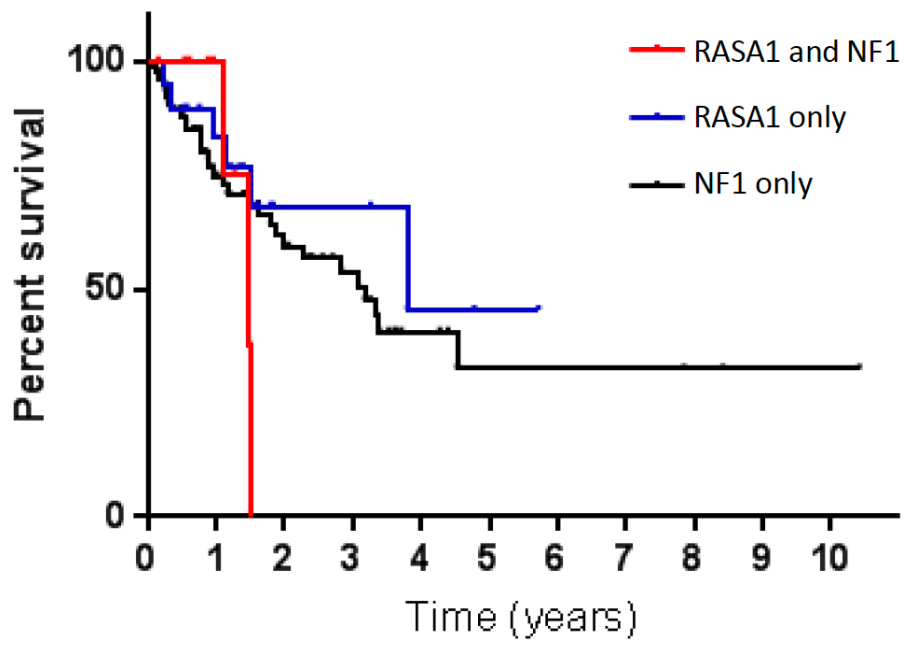

Supplement: NIHMS1523591-supplement-3.pdf [file NIHMS1523591-supplement-3.pdf]
